# Supplementary material for: Is metal metathesis a framework-templating strategy to synthesize coordination polymers (CPs)? Transmetallation studies involving flexible ligands
Source: Royal Society of Chemistry journal article supplement (doi:10.1039/c4ra04166f), 2014-01-01
Supplement: c4ra04166f1.pdf [file c4ra04166f1.pdf]

**Is Metal Metathesis a Framework-Templating Strategy to Synthesize Coordination Polymers?  
Transmetallation Studies involving Flexible ligands**

Kumari Suman,<sup>a</sup> Fayaz Baig,<sup>a</sup> Rajnikant,<sup>b</sup> Vivek K. Gupta<sup>b</sup> Sanjay Mandal<sup>c</sup> and Madhushree Sarkar\*<sup>a</sup>

<sup>a</sup> Department of Chemistry, Birla Institute of Technology and Science , Pilani, Pilani Campus, Rajasthan, India. Fax: +91-1596-244183; Tel: +91-1596-245073; E-mail: msarkar@pilani.bits-pilani.ac.in

<sup>b</sup> Post Graduate Department of Physics, University of Jammu, Jammu Tawi, India. Fax/Tel:+91-191-2432051 E-mail: rkvk.paper11@gmail.com

<sup>c</sup> Department of Chemical Sciences, Indian Institute of Science Education and Research, Mohali Mohali (Punjab) 140306, INDIA Email: sanjaymandal@iisermohali.ac.in

Supporting Information

(Synthesis details, ORTEP, IR Spectra, Powder XRD, Atomic Absorption Spectra (AAS), Wavelength Dispersive X-Ray Fluorescence (WD-XRF); Thermogravimetric analysis (TGA))



**General:** Infra-red spectrum was recorded in FTIR ABB Bomen MB-3000. Elemental analyses were obtained with a Thermo finnigan, Italy, Model FLASH EA 1112 series. Powder X-ray diffraction (XRD) data were recorded with a Rigaku miniflex II,  $\lambda = 1.54$ , Cu K $\alpha$ . Atomic Absorption Spectra (AAS) was measured using AA-7000, Shimadzu. Wavelength Dispersive X-Ray Fluorescence (WD-XRF) was measured using S8 TIGER, Make: Bruker, Germany; with X-Ray tube of 4KW with 'Rhodium' target and a high volatage/tube current: 60kv/64 mA. Thermogravimetric analysis (TGA) data were recorded under a N<sub>2</sub> atmosphere at a heating rate of 2°Cmin<sup>-1</sup> with a Perkin-Elmer instrument. The single crystal data was collected on a Xcalibur, Sapphire3 X-ray diffractometer that uses graphite monochromated Mo K $\alpha$  radiation ( $\lambda = 0.71073$  Å) by the  $\omega$ -scan method.<sup>1</sup> The structures were solved by direct methods and refined by least square methods on F<sup>2</sup> using SHELX-97.<sup>2</sup> Non-hydrogen atoms were refined anisotropically and hydrogen atoms were fixed at calculated positions and refined using a riding model.

**Synthesis of ligand 1b:** 3-Amino pyridine (2 mmol) was added to 40 mL of a pyridine solution of adipic acid (1 mmol), and the solution was stirred for 15 min. To this solution was added triphenyl phosphite (2 mmol), and the mixture was refluxed for 5 h. The volume of the solution was reduced to 5 mL by distilling out the pyridine, and a white precipitate was obtained. The solid was filtered, washed with water, and dried under vacuum. Yield: 70%. Mp: 216-220°C. FTIR (KBr, cm<sup>-1</sup>): 3301(w), 3247(m), 3178(m), 3108(m), 3039(m), 2947(vs), 2917(s), 2875(m), 1690(vs), 1580(vs), 1550(s), 1478(m), 1419(vs), 1378(m), 1281(vs), 1157(s), 1132(w), 1034(m), 943(m), 910(w), 856(w), 810(s), 735(w), 701(m), 625(w), 578(w).

**Synthesis of CP-3-Cu,**  $\{(Cu(\mathbf{1b})_2(H_2O)_2) \cdot 2(ClO_4) \cdot (H_2O)\}_n$ : The ligand **1b** (596 mg, 2.0 mmol) dissolved in 15ml of 1:1 mixture of water-Ethanol solvent system. To the above solution, 10 ml ethanolic solution of Cu(ClO<sub>4</sub>)<sub>2</sub>·6H<sub>2</sub>O (370.1 mg, 1.0 mmol) was added. The resulted blue precipitate was dissolved by adding few drops of water. The solution was filtered and kept for slow evaporation. Blue-colored crystals were formed after 8-10 days in 80% yield. Anal. Calcd (%)for C<sub>32</sub>H<sub>44</sub>CuCl<sub>2</sub>N<sub>8</sub>O<sub>16</sub>:C, 41.27; H, 4.72; N 12.03 Found: C, 41.27; H, 4.55; N, 11.63; FTIR (KBr, cm<sup>-1</sup>): 3564(s), 3278(s), 3201 (w), 3101(w), 2931(w), 2862(w), 1674(s), 1612(w), 1589(w), 1550(vs), 1488(m), 1427(s), 1365(w), 1296 (m), 1242(w), 1195(w), 1103(vs), 956(w), 918(w), 810(m), 702(m), 624(m), 555(w).

**Synthesis of CP-4-Cd,**  $\{(Cd(\mathbf{1b})_2(H_2O)_2) \cdot 2(ClO_4) \cdot 2(H_2O)\}_n$ : Microwave assisted technique was used wherein ligand **1b** (59.6 mg, 0.2 mmol) and Cd(ClO<sub>4</sub>)<sub>2</sub>·6H<sub>2</sub>O (41.94 mg, 0.1 mmol) was taken 5ml of 1:1

mixture of water-Ethanol into a specially designed microwave test tube. The reaction mixture was irradiated for 10 minutes at 90°C, at medium stirring rate and 100 psi pressure. White crystals suitable for single crystal XRD were formed after keeping the solution for a day. Anal. Calcd (%) for  $C_{32}H_{44}CdCl_2N_8O_{16}$ : C, 39.22; H, 4.53; N, 11.43 Found: C, 41.69; H, 4.57; N, 10.69

FTIR (KBr,  $cm^{-1}$ ): 3865(s), 3841(s), 3741(vs), 3672(m), 3649(m), 3618(m), 3564(w), 3317(vs), 1674(vs), 1527(vs), 1481(s), 1419(s), 1326(w), 1288(m), 1164(w), 1103(vs), 956(w), 802(w), 771(s), 702(w), 624(m), 563(m).

**Table S1: Elemental Analysis (Calculated)**

| Found                                                                               | C %   | H %  | N %   |
|-------------------------------------------------------------------------------------|-------|------|-------|
| Calculated: Chemical Formula: $C_{32}H_{44}CdCl_2N_8O_{16}$                         | C %   | H %  | N %   |
| 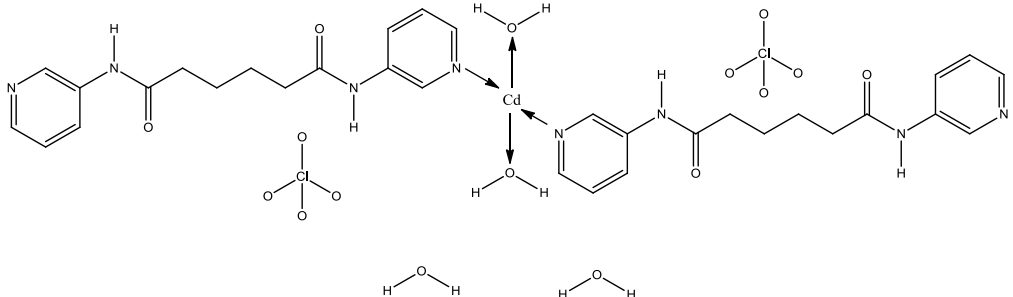  | 39.22 | 4.53 | 11.43 |
| Calculated: Chemical Formula: $C_{36}H_{52}CdCl_2N_8O_{16}$                         | C %   | H %  | N %   |
|  | 41.73 | 5.06 | 10.81 |

**Synthesis of CP-4-Cu:** Metal-metathesis reaction was performed on **CP-4-Cd** wherein crystals of **CP-4-Cd** were immersed into 0.1 M ethanolic solution of  $Cu(ClO_4)_2 \cdot 6H_2O$ . The white crystals slowly turned blue crystals. The crystals were analyzed by IR, Powder XRD, AAS and WD-XRF spectroscopy.

Figure S1. IR spectra of Ligand 1b:

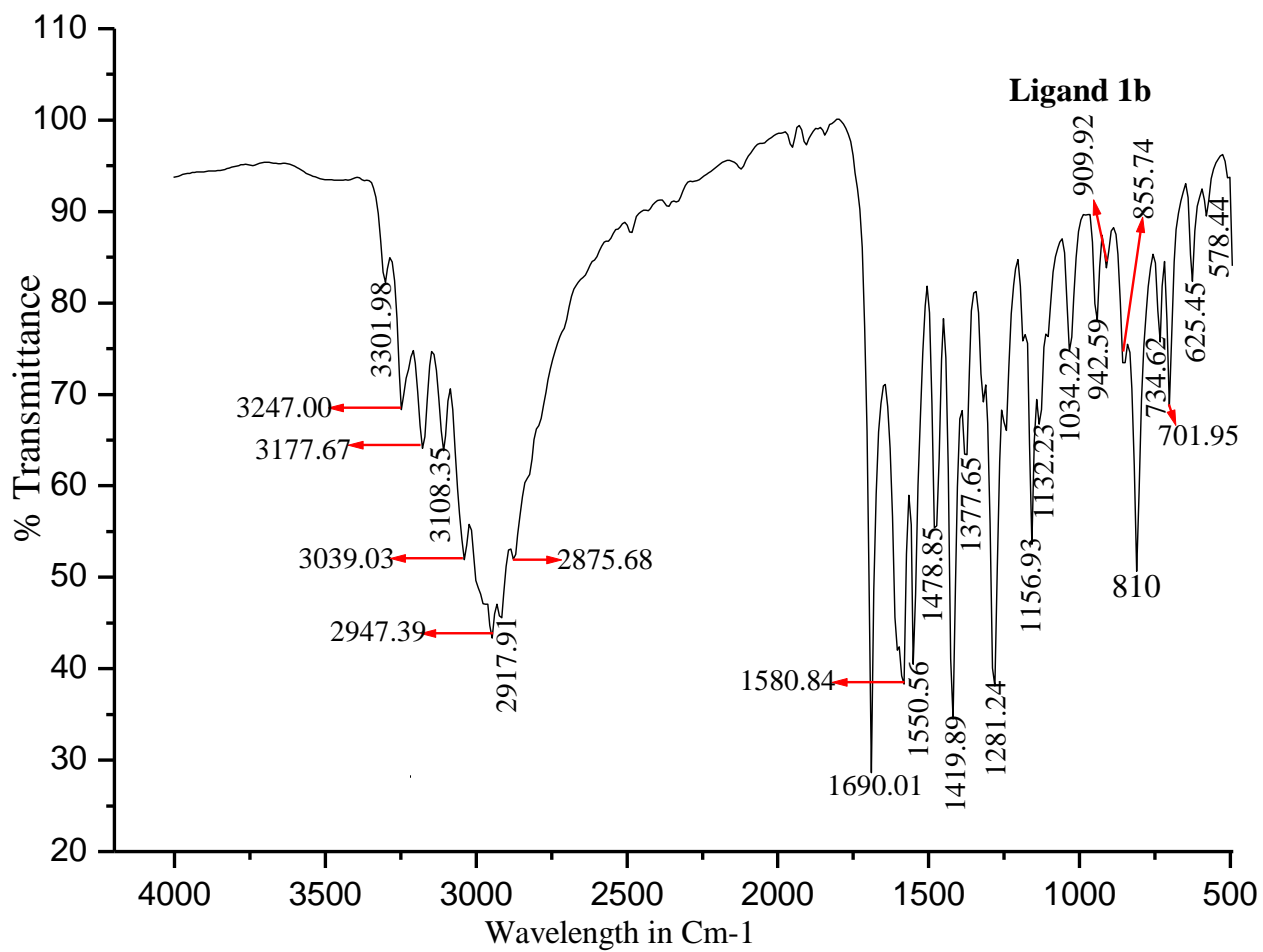

Figure S2. IR Spectra of CP-3-Cu

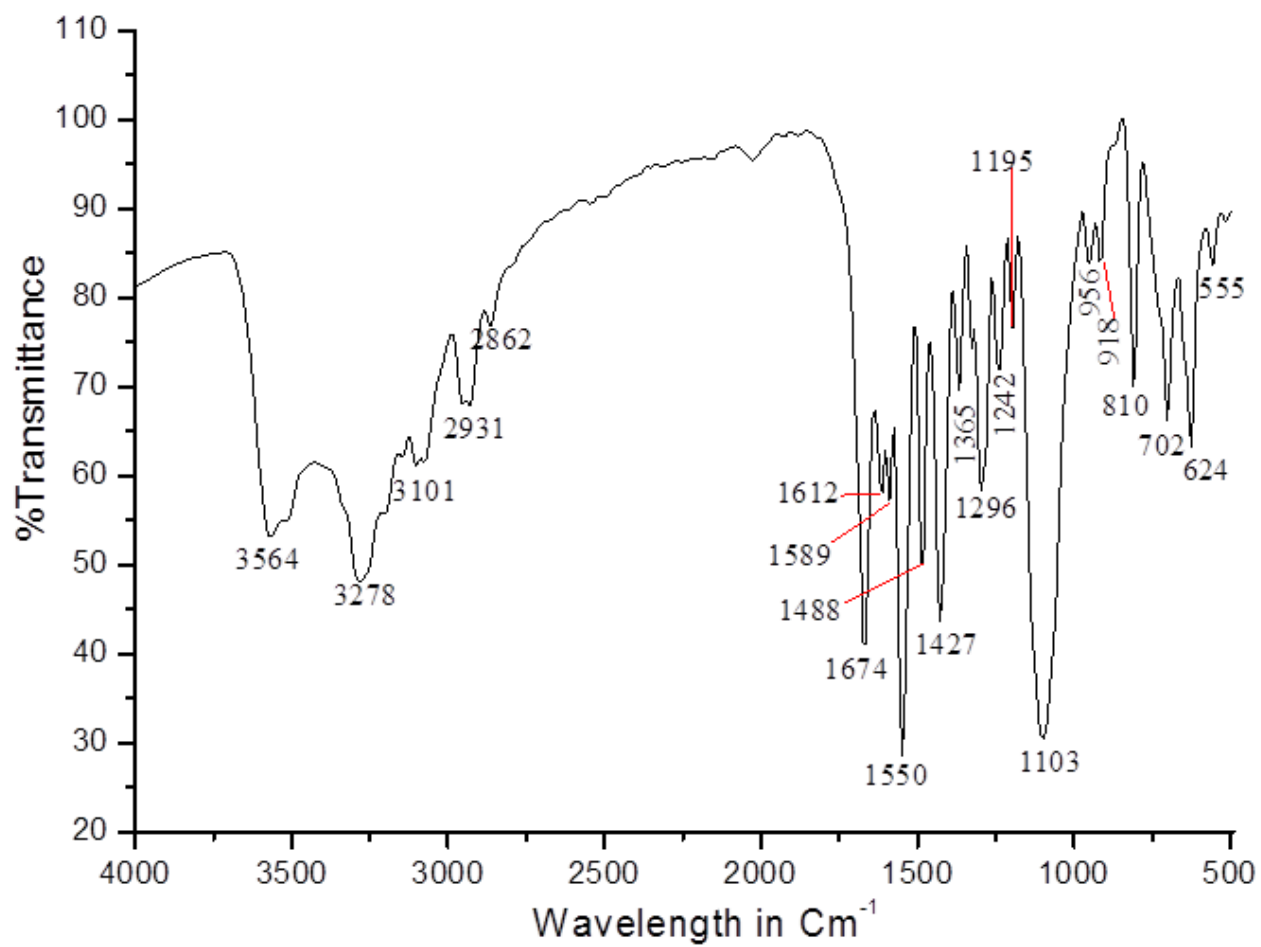

Figure S3. IR Spectra of CP-4-Cd

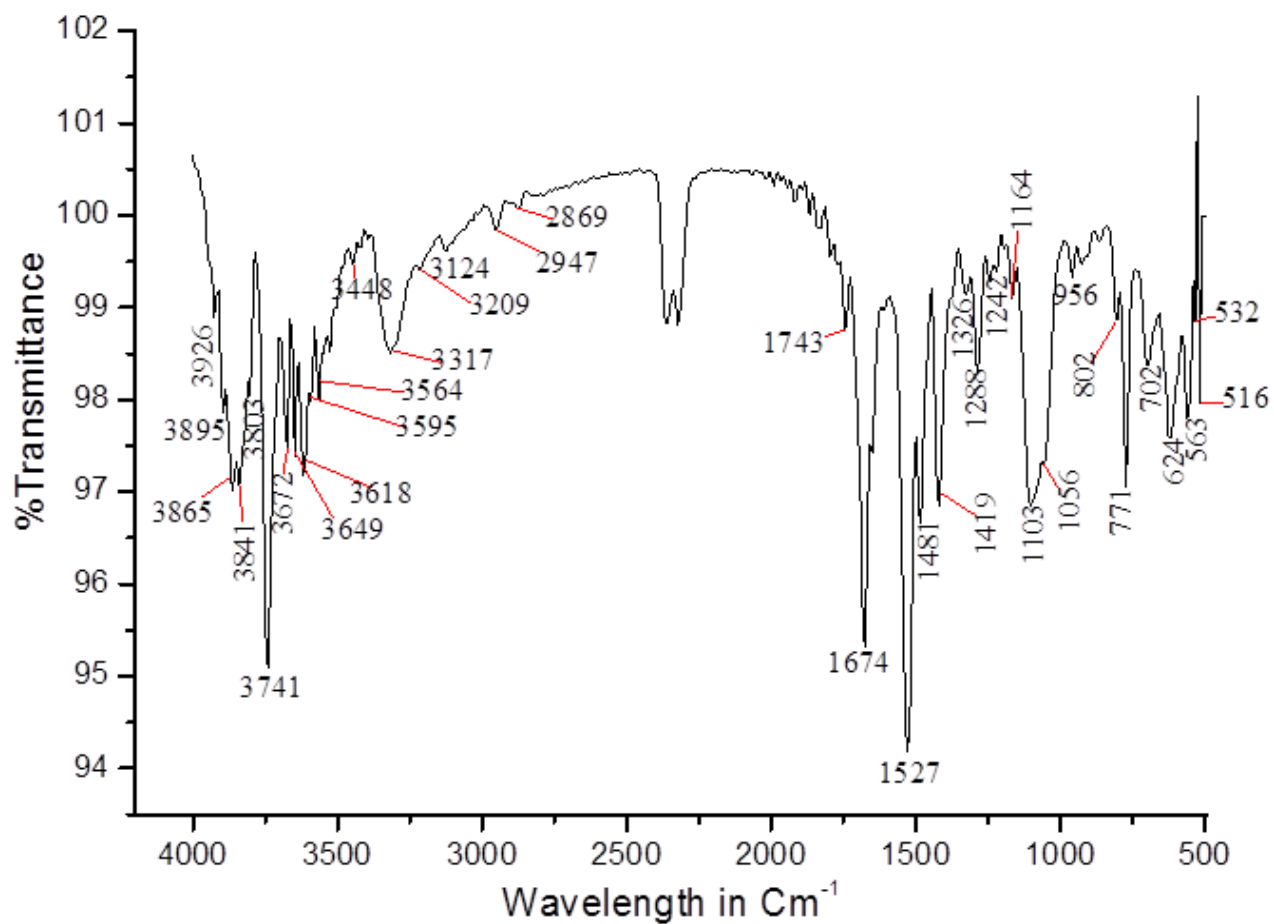

**Figure S4. Powder XRD of CP-3-Cu (Calculated)**

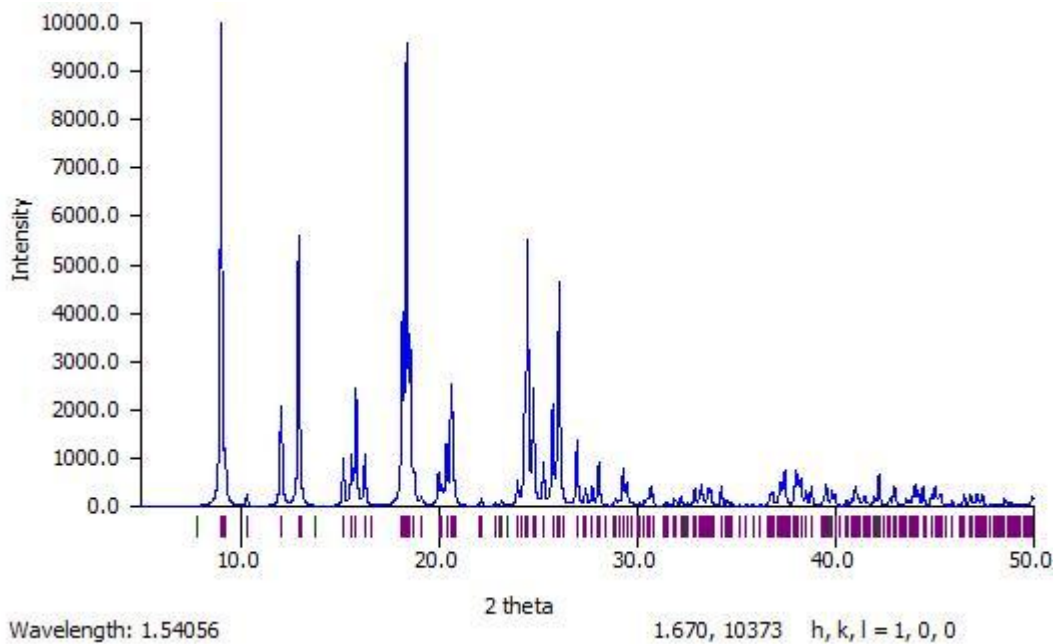

**Figure S5: Powder XRD of CP-3-Cu (Experimental)**

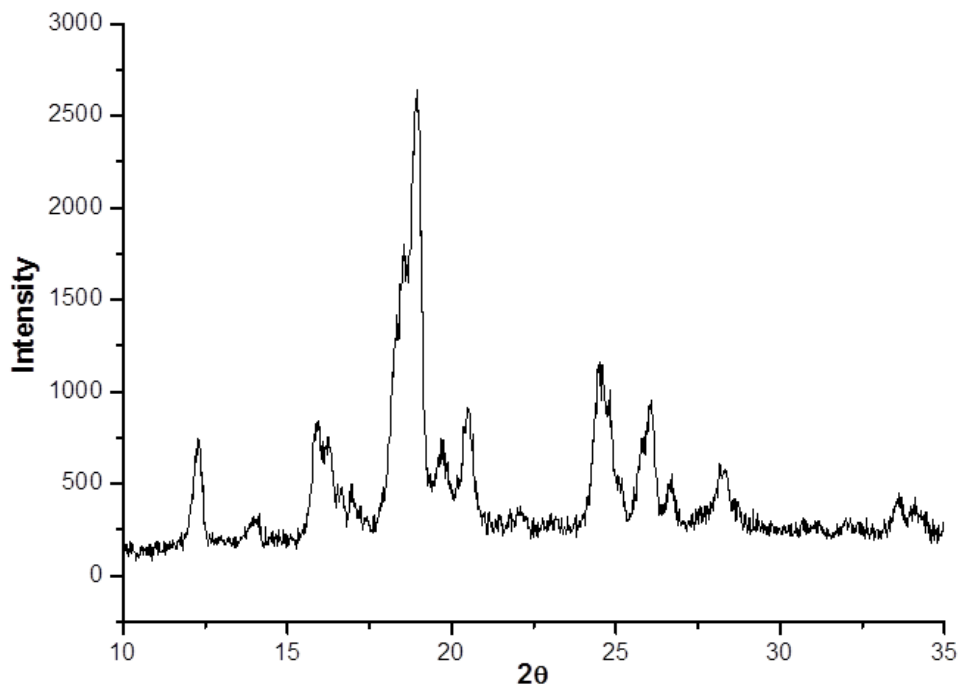



**Figure S6. Powder XRD of CP-4-Cd (Calculated)**

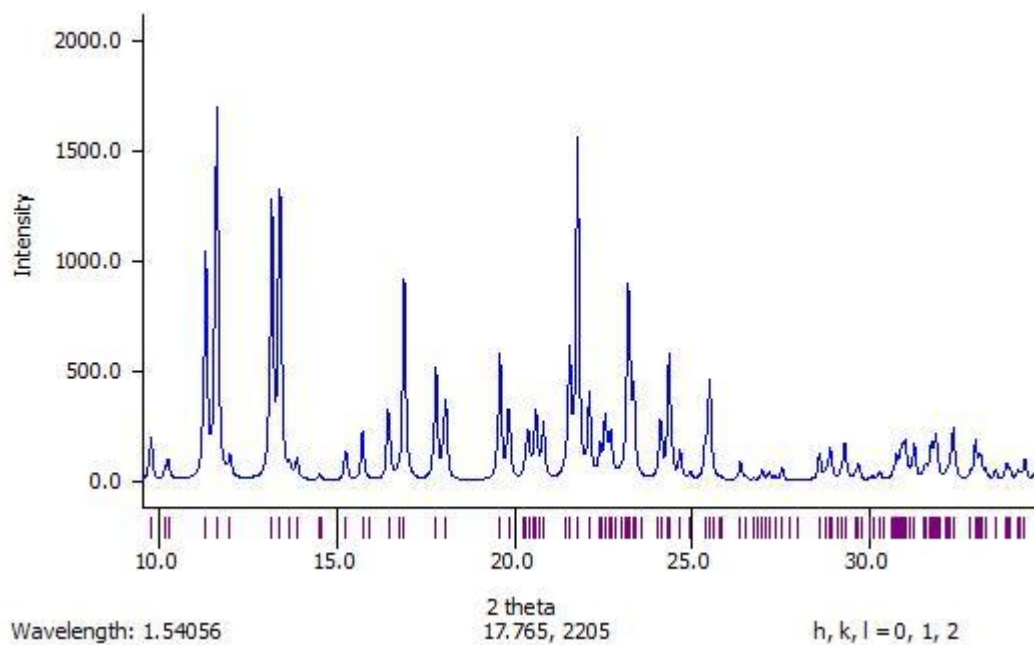

**Figure S7: Powder XRD of CP-4-Cd (Experimental)**

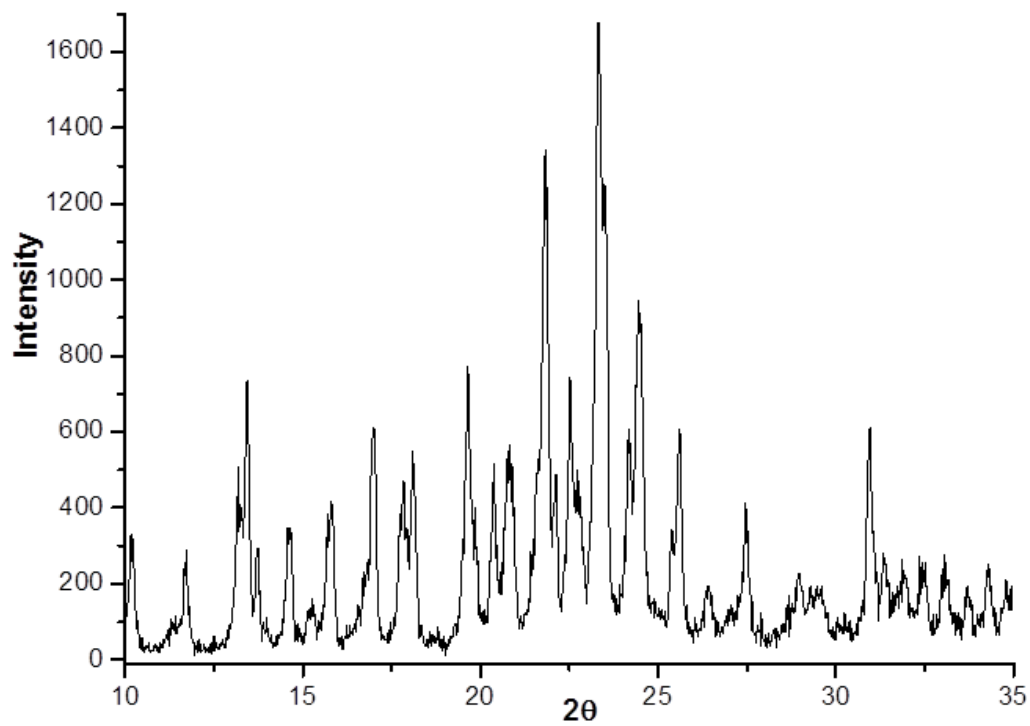

Figure S8: Powder XRD of CP-4-Cu (Experimental)

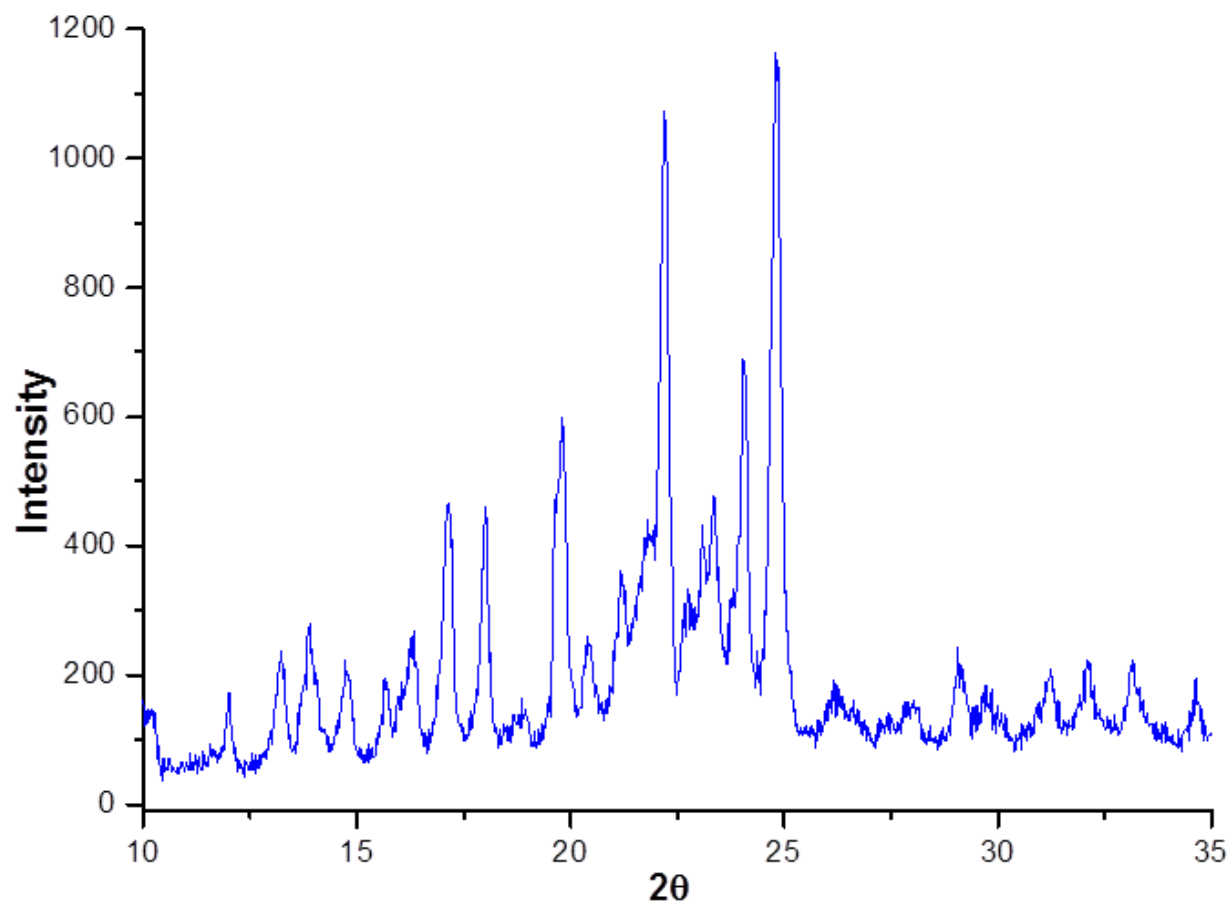

Figure S9: Powder XRD of CP-3-Cu and CP-4-Cu;

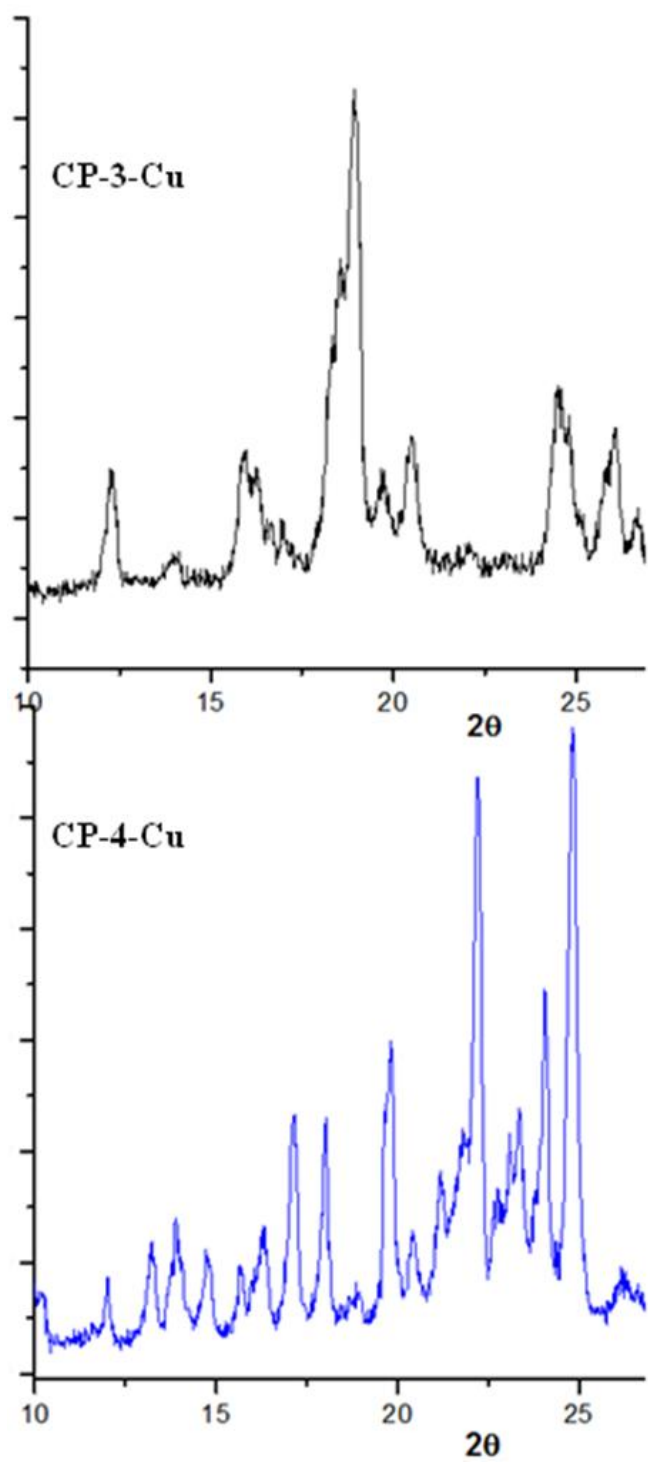

Figure S 10: Thermal Analysis of CP-3-Cu

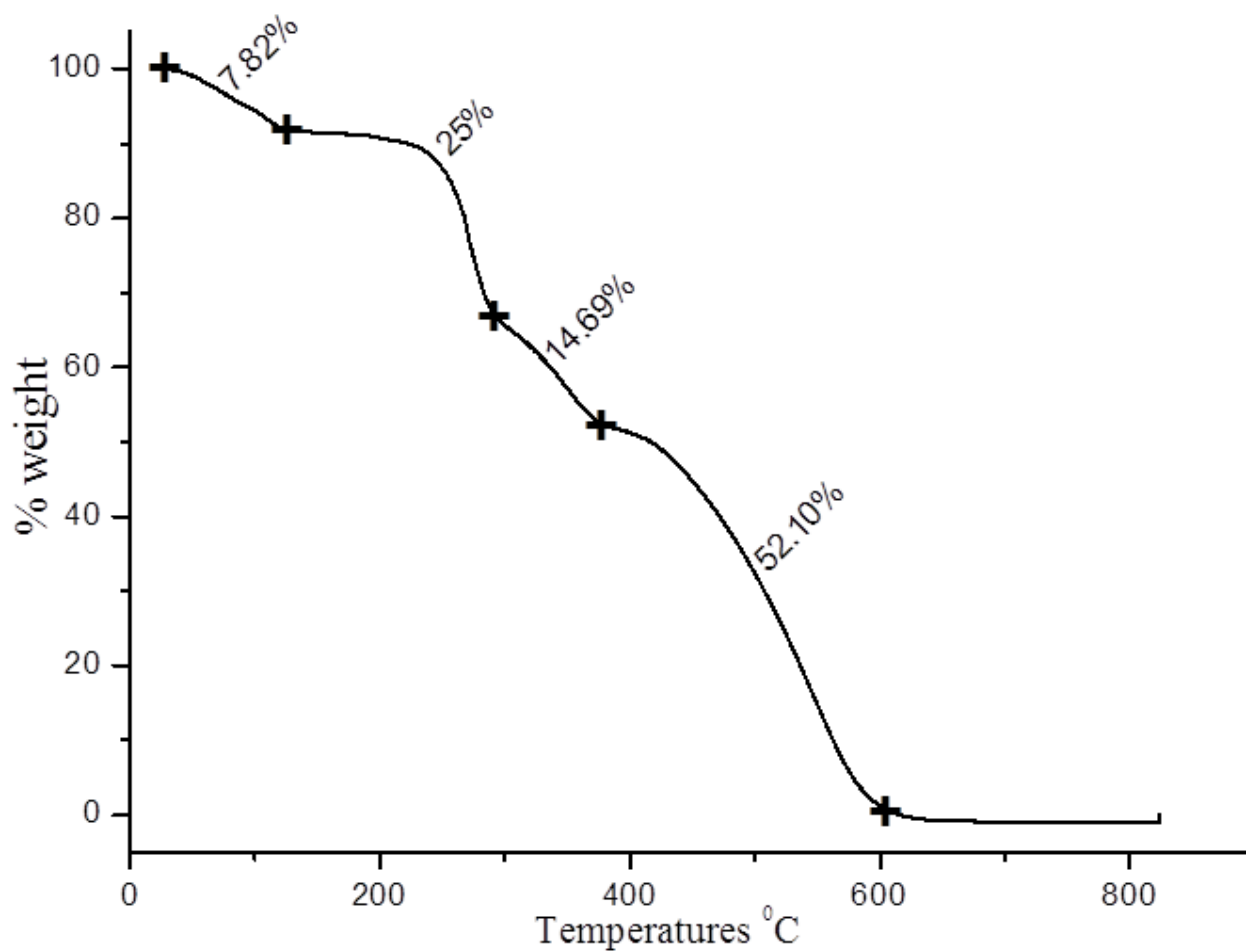

Initial Weight loss of 7.82 % corresponds to the loss of four water molecules (Calculated 7.804%). The coordination polymer degrades beyond 250°C.

Figure S 11: Thermal Analysis of CP-4-Cd

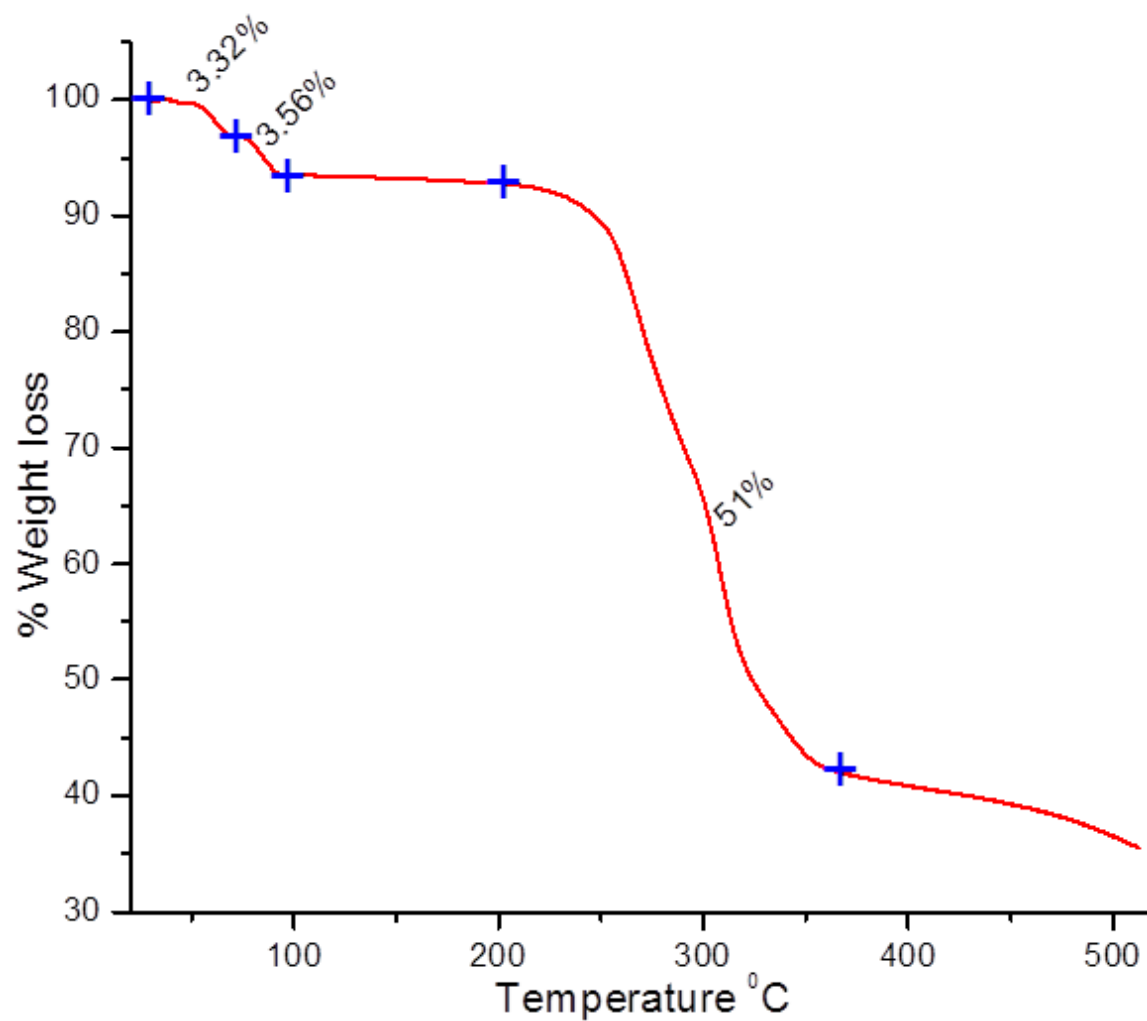

Initial Weight loss of 3.32 % corresponds to the loss of two water molecules (Calculated 3.70%). The weight loss of 3.56% corresponds to the further loss of two water molecules (Calculated 3.84%)..

Figure S 12: WD-XRF of the Transmetalation Reaction at various intervals (Intensity vs 2 $\theta$ )

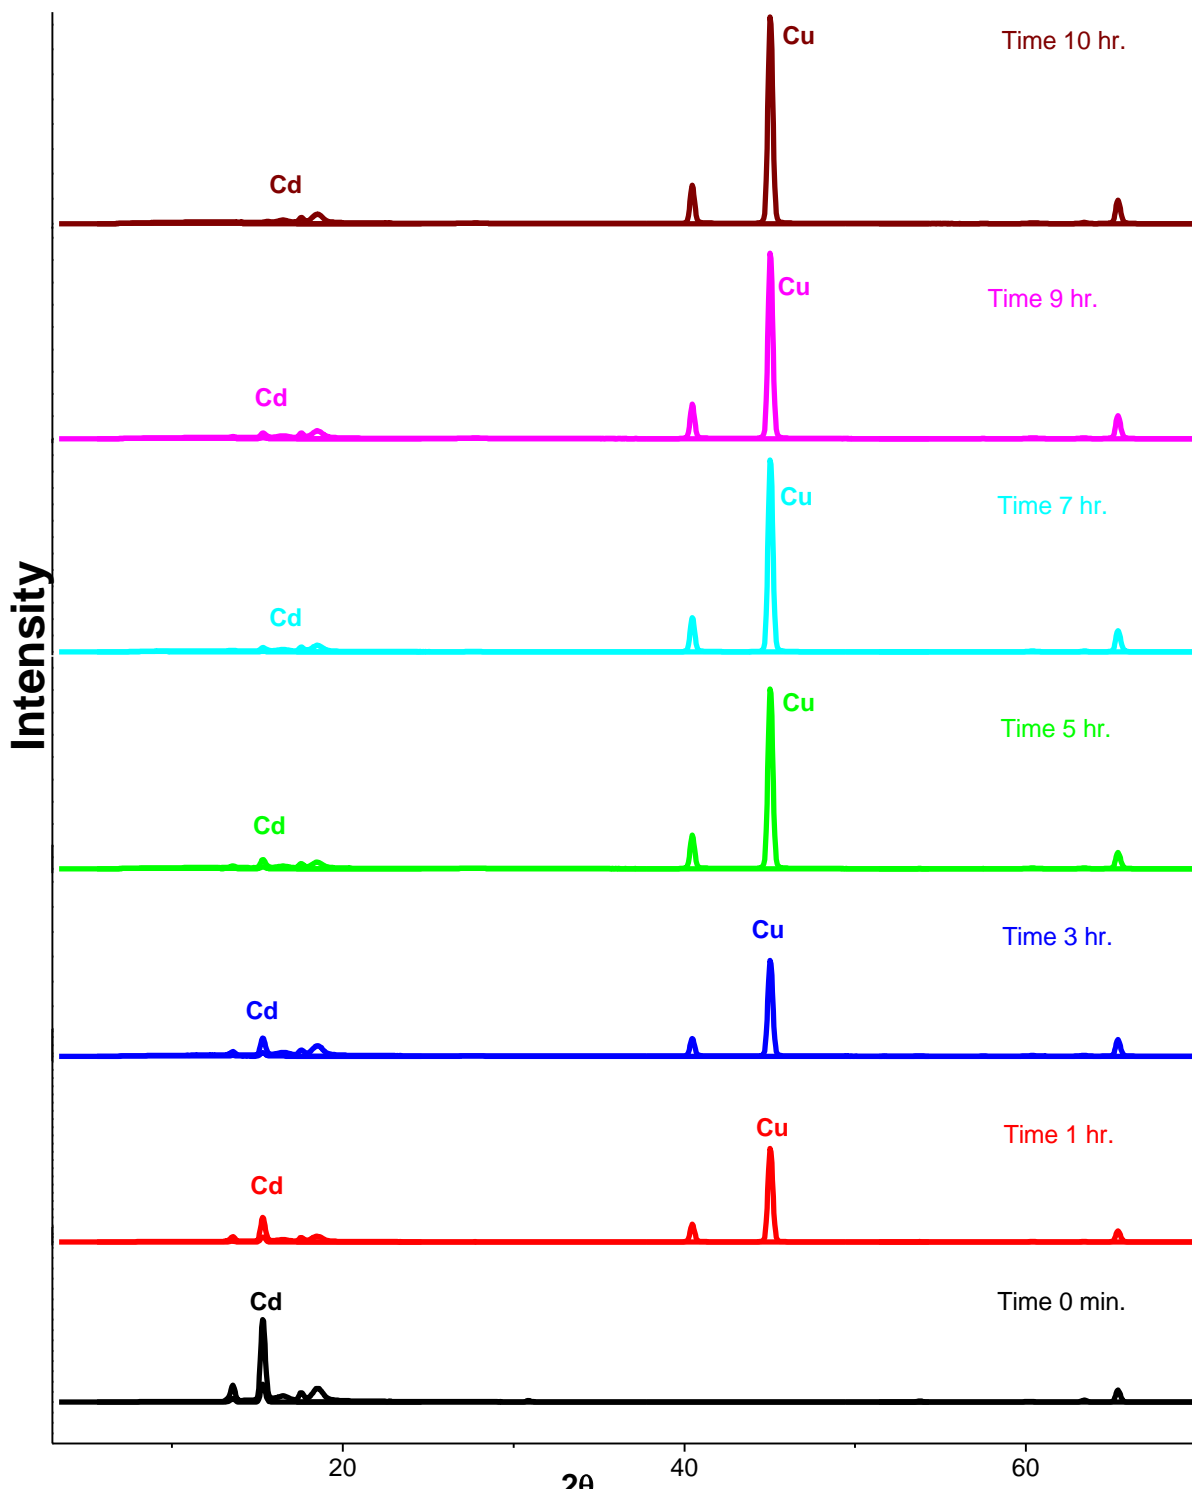

**Figure S 13 WD-XRF (Intensity vs Binding Energy) of the Transmetallation Reaction at various intervals [CP-4-Cd + Cu(ClO<sub>4</sub>)<sub>2</sub> → CP-4-Cu ]**

(a) At the start of the reaction (time = 0)

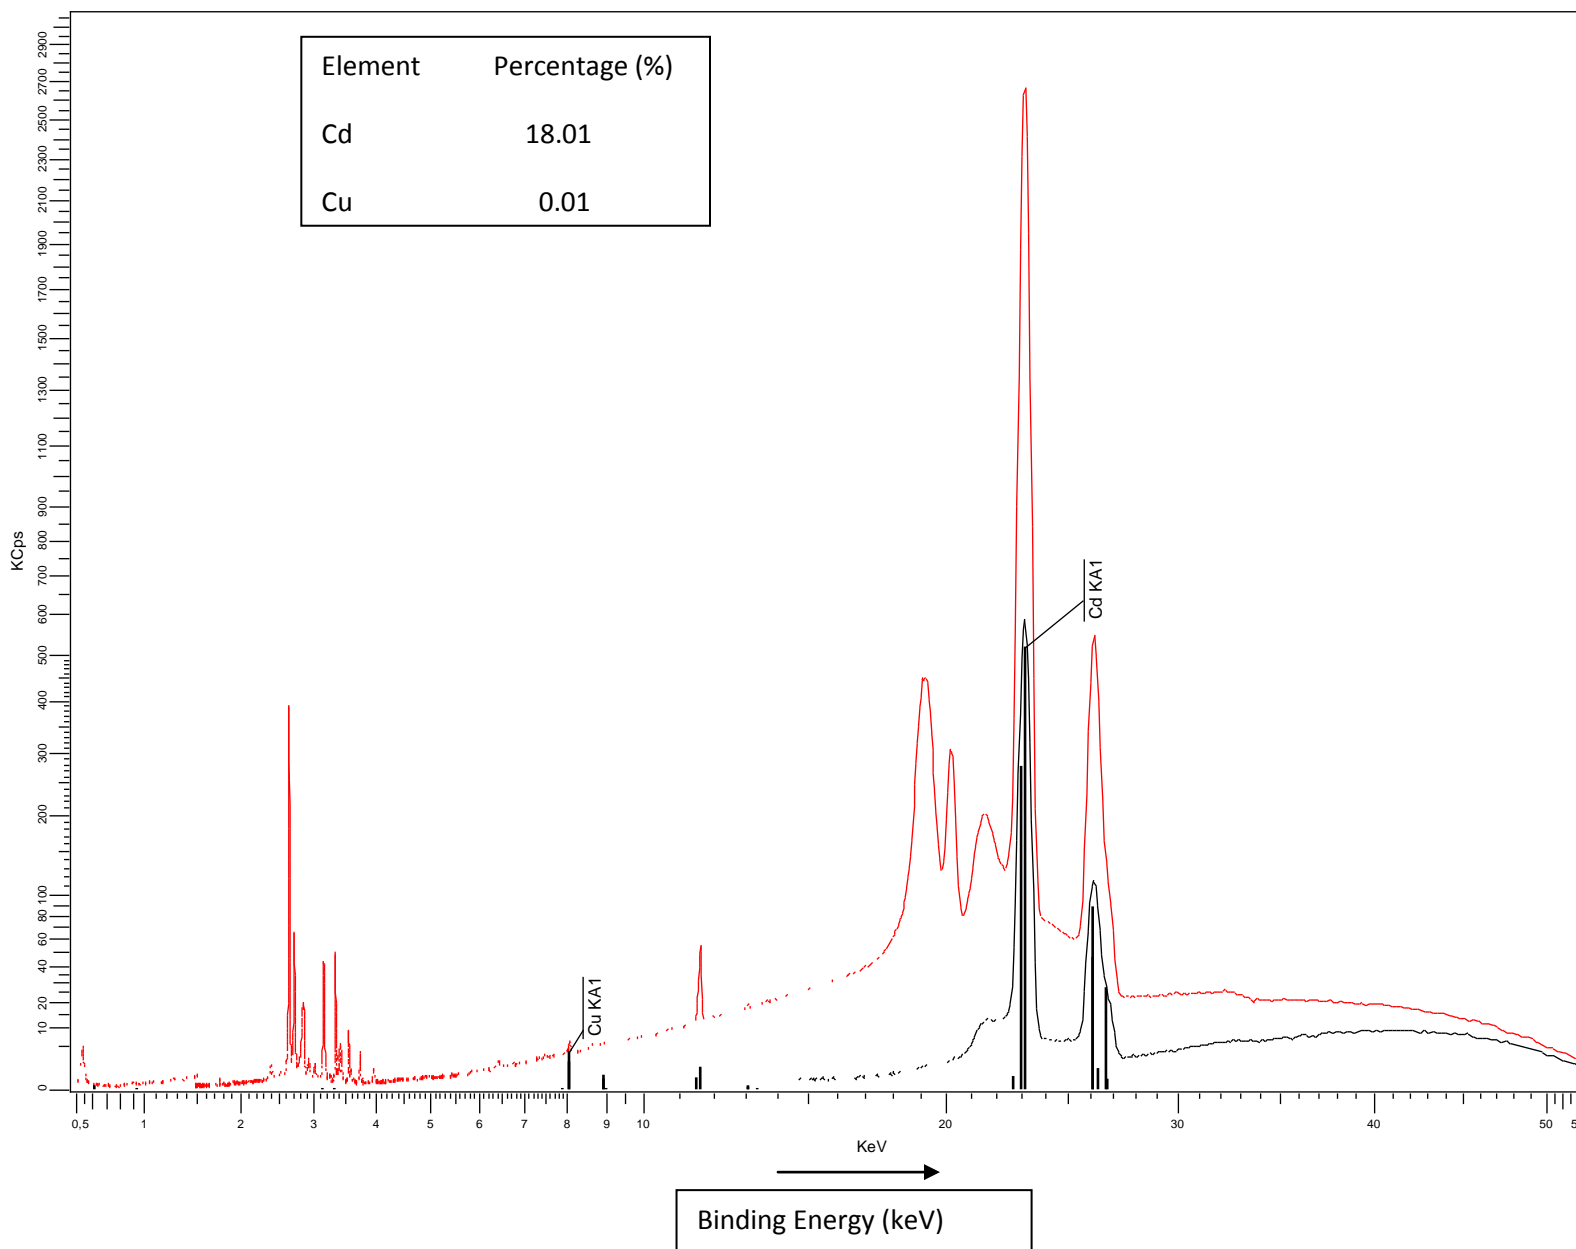

(b) After one hour of reaction

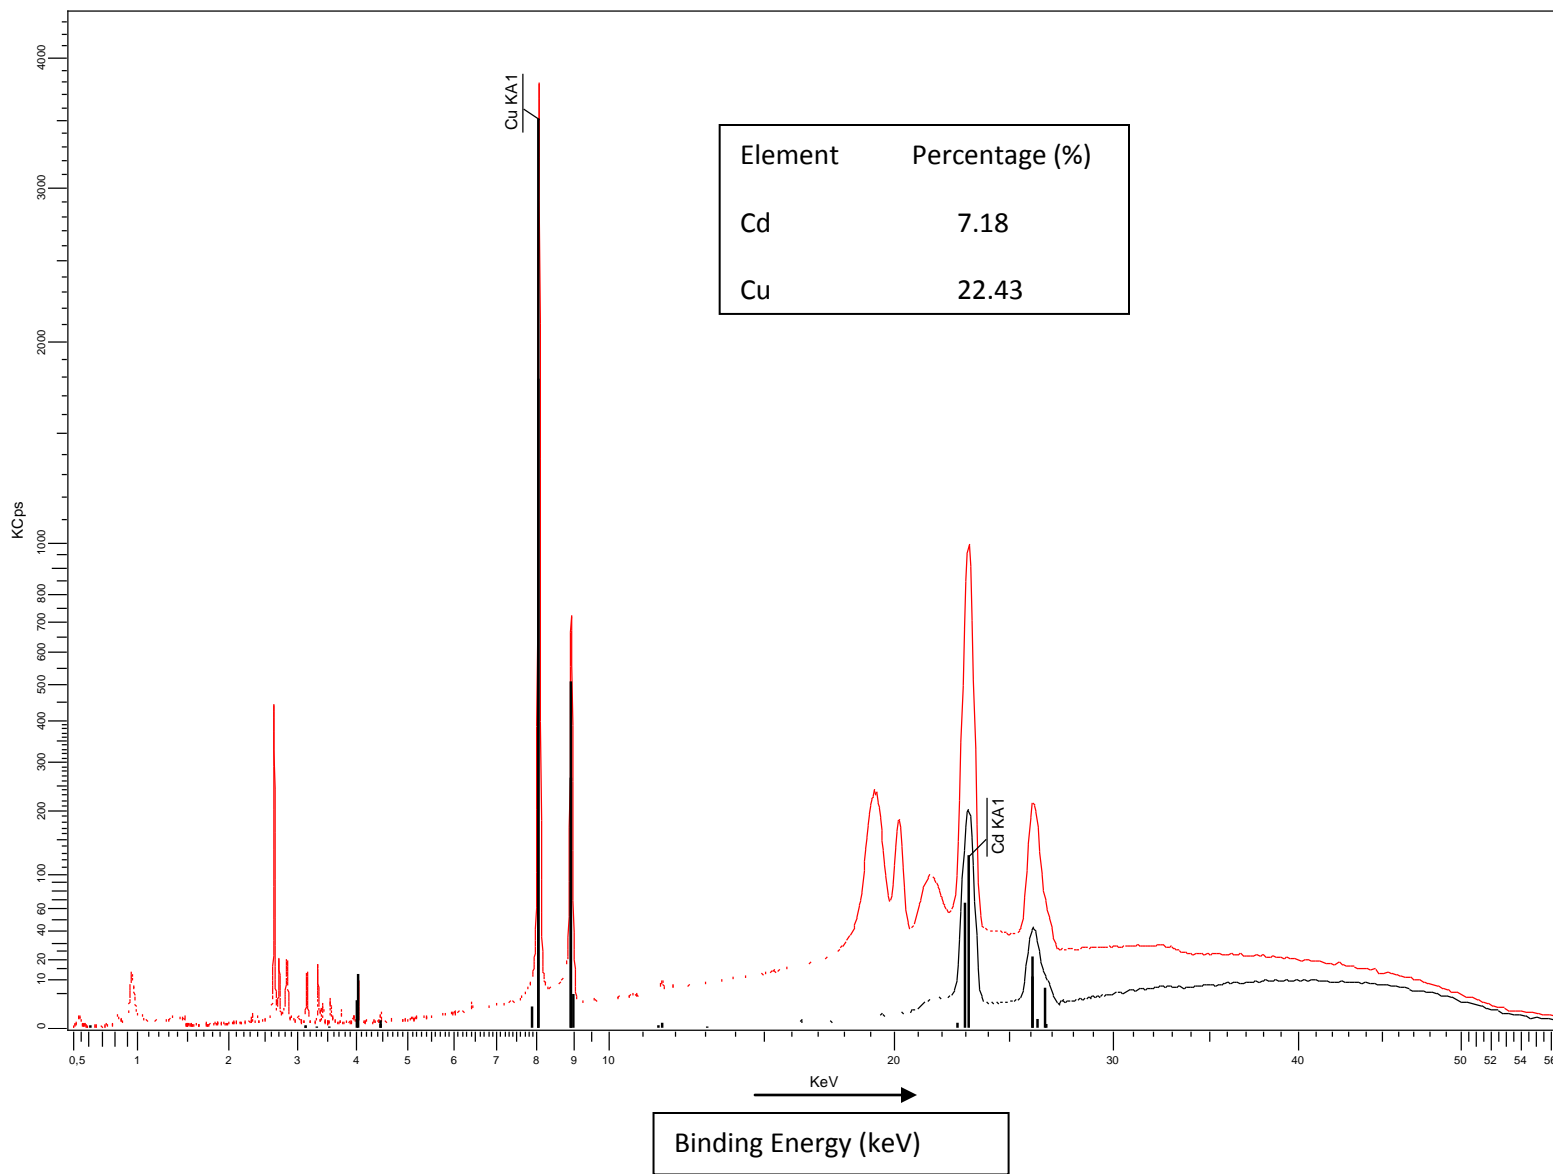



(c) After three hour of reaction

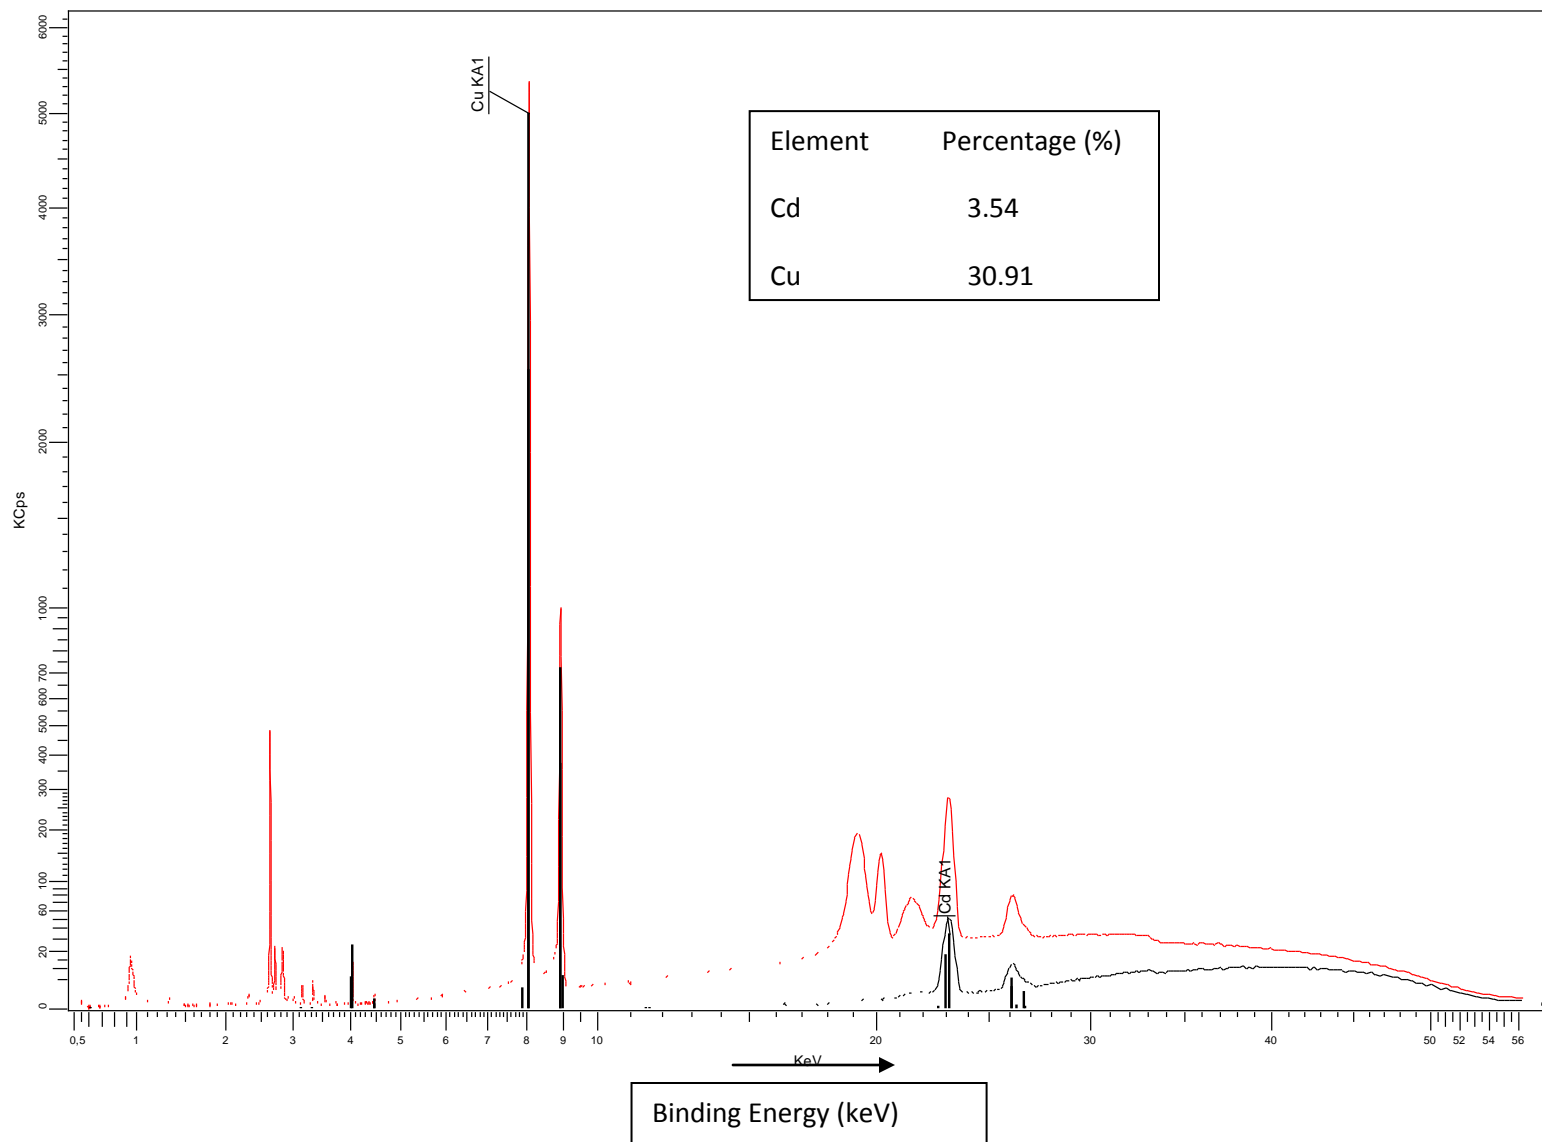

(d) After five hour of reaction

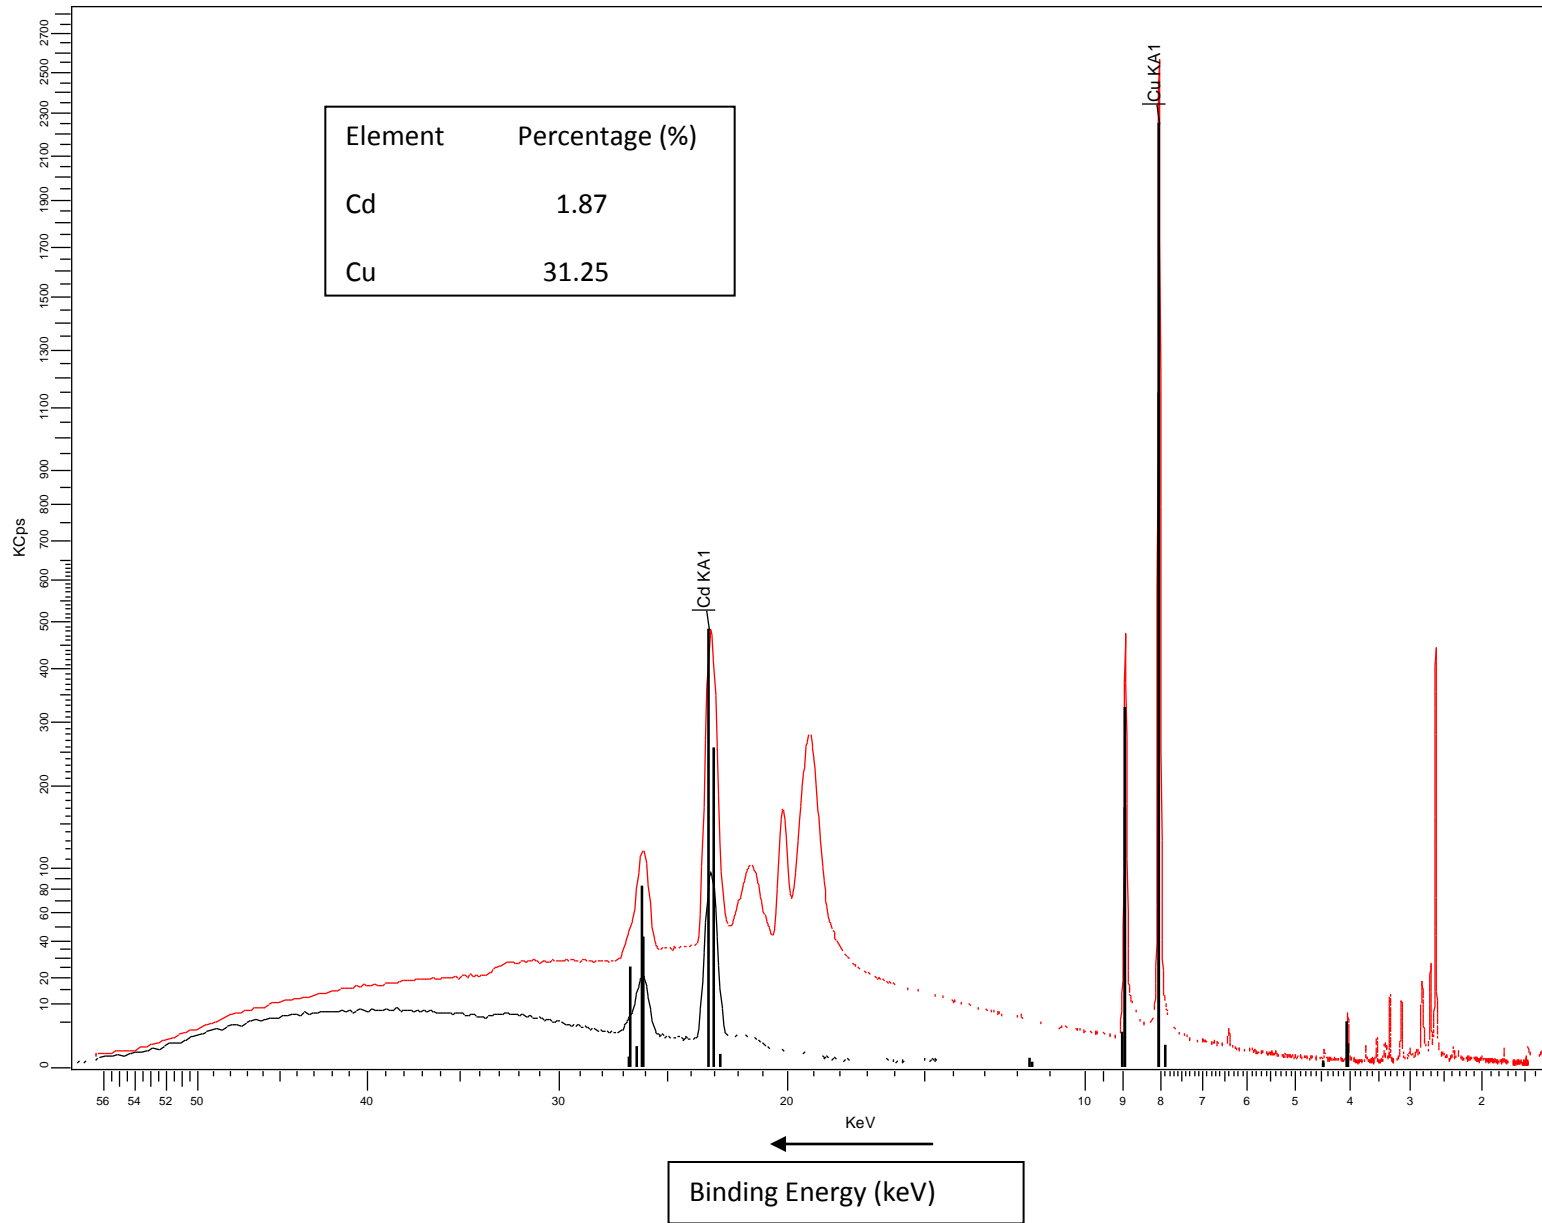

(e) After seven hour

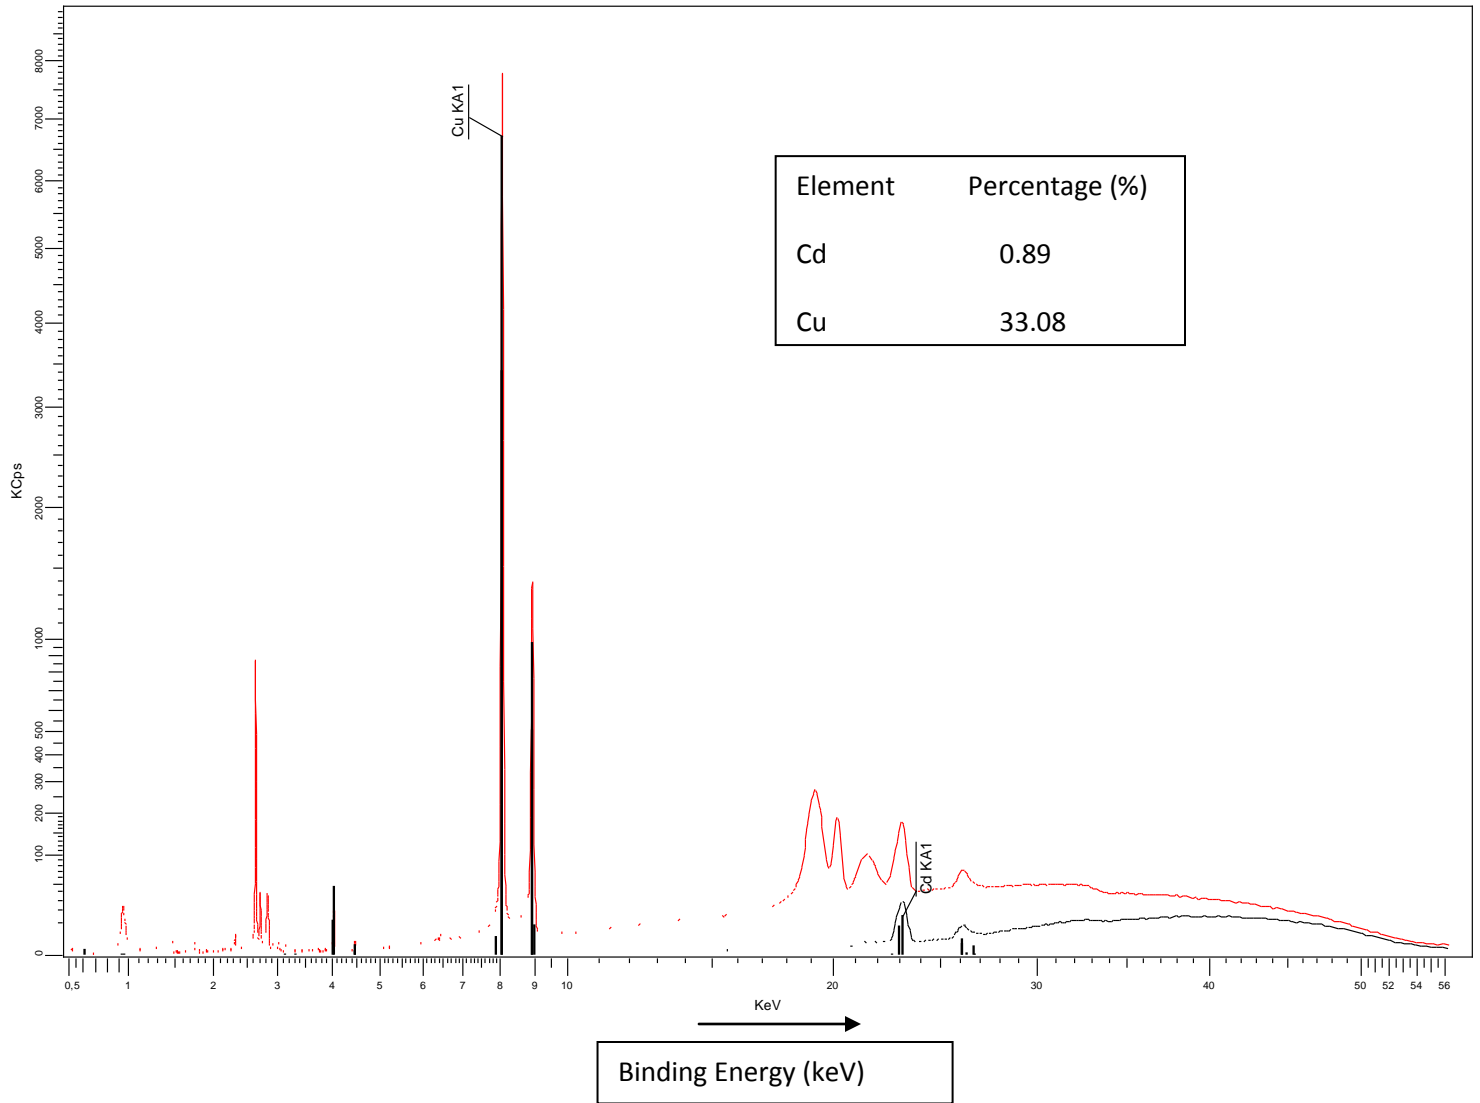

(f) After nine hour

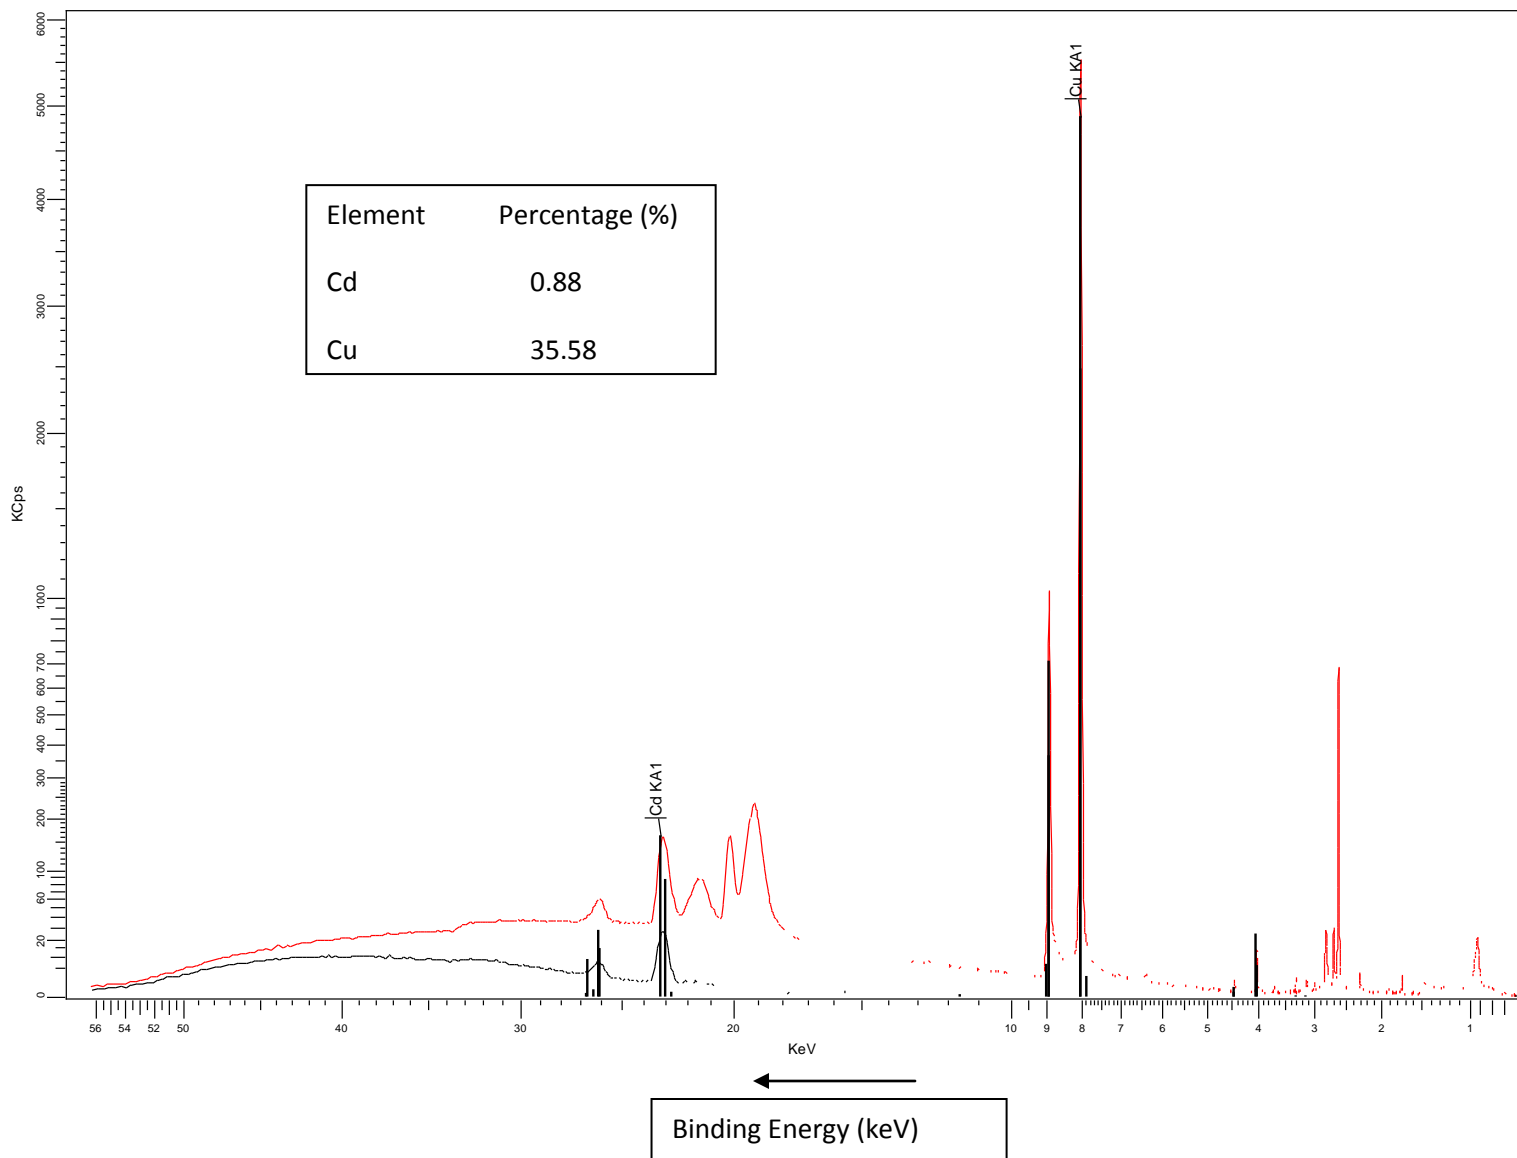

(g) After ten hour

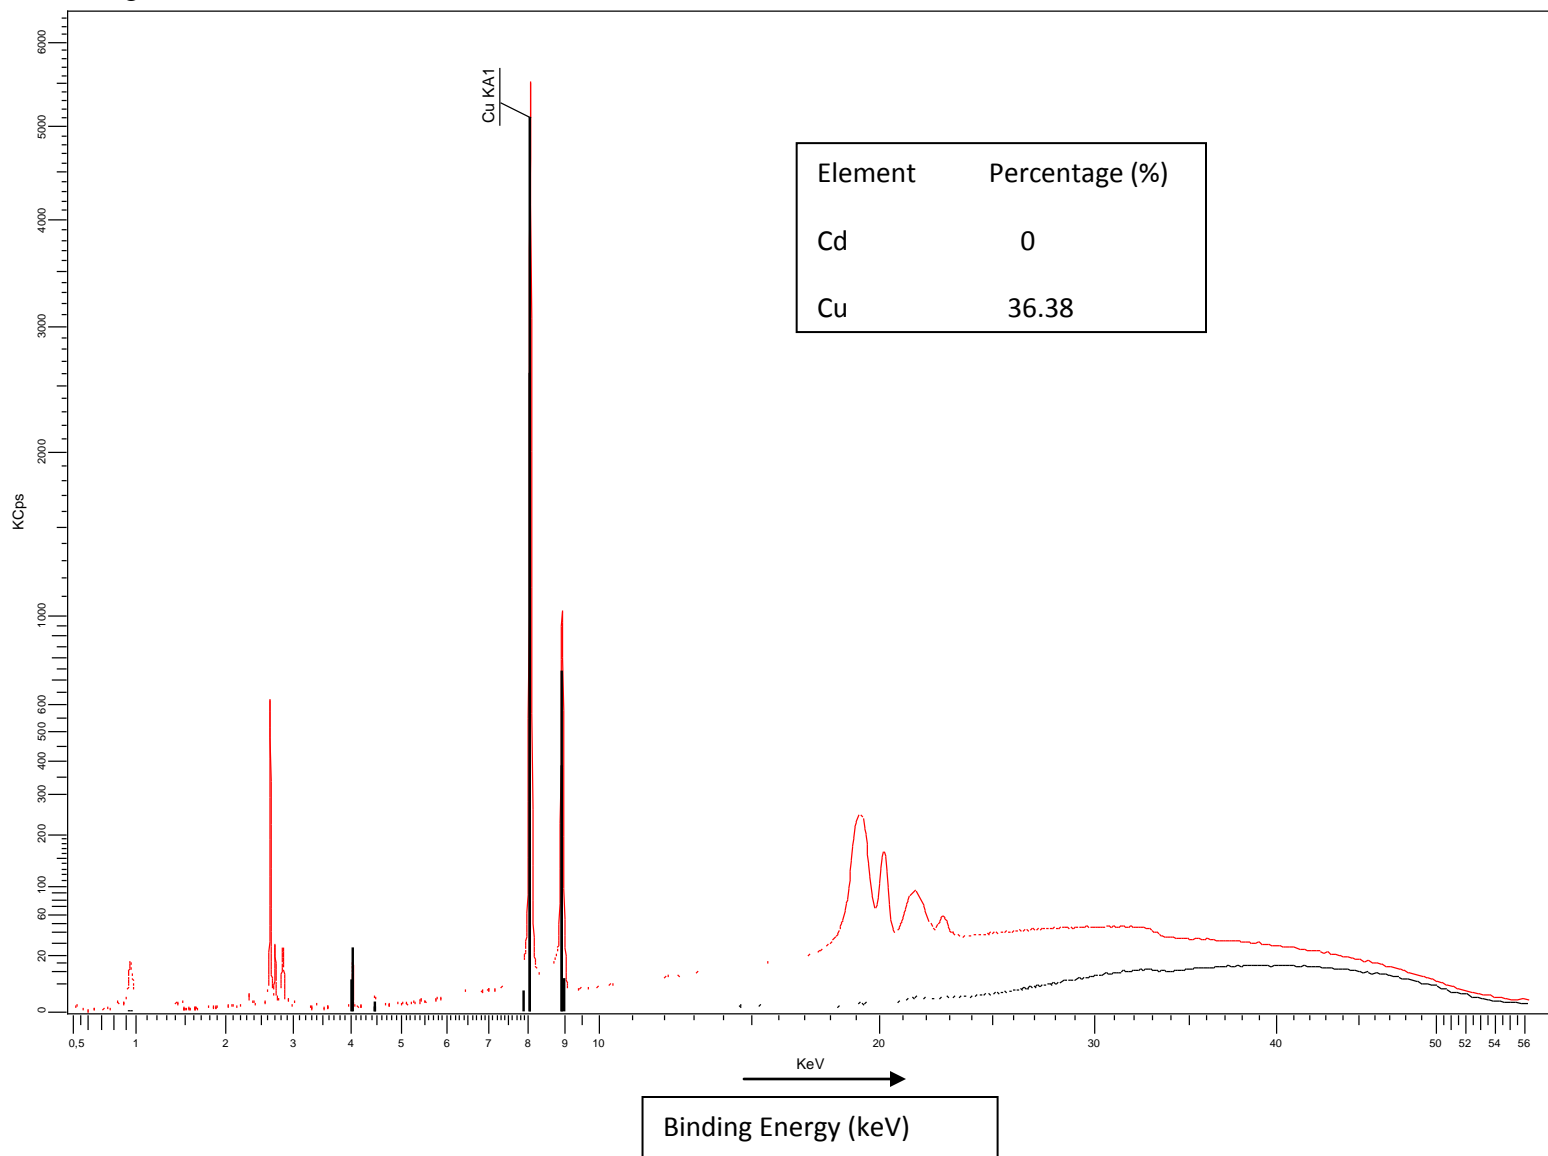

Figure S 14: ORTEP of CP-3-Cu

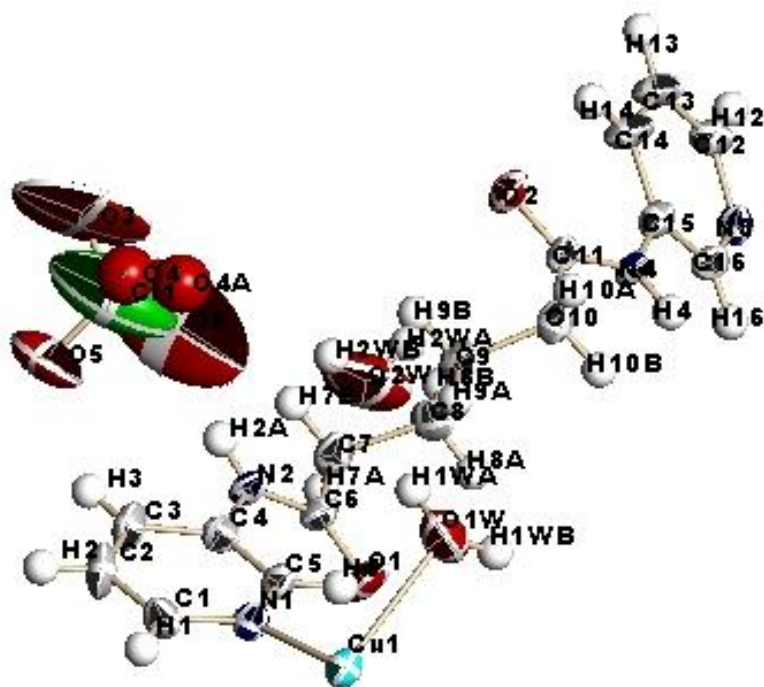

Figure S 15: ORTEP of CP-4-Cd

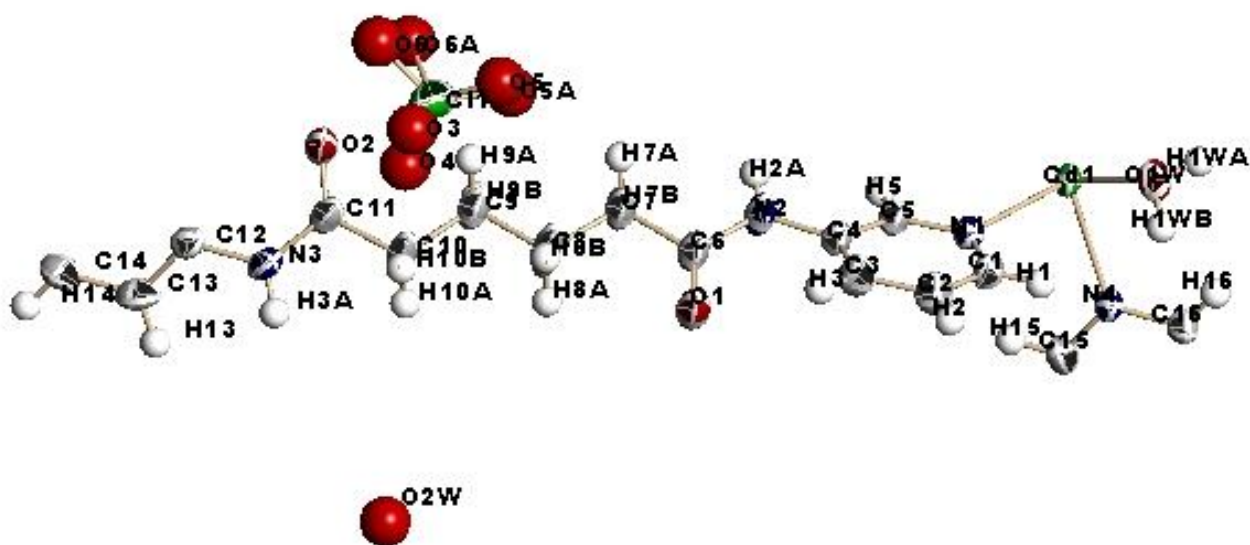

## References:

1. *CrysAlis PRO* (Oxford Diffraction, 2010, Oxford Diffraction Ltd., Yarnton, Oxfordshire, England)
2. G. M. Sheldrick, *Acta Cryst. A*, 2008, **64**, 112.
3. (a) M. Sarkar and K. Biradha, *Cryst. Growth Des.*, 2006, **6**, 202; (b) L. Rajput, S. Singha and K. Biradha, *Cryst. Growth Des.*, 2007, **7**, 2788.
